# Supplementary material for: Probing lattice vibration and strain states in highly phosphorus-doped epitaxial Si films
Source: Royal Society of Chemistry journal article supplement (doi:10.1039/c7tc02715j), 2017-01-01
Supplement: c7tc02715j1.pdf [file c7tc02715j1.pdf]

## **Electronic Supplementary Information (ESI)**

### **Probing Lattice Vibration and Strain States in Highly Phosphorus-doped Epitaxial Si films**

Minhyeong Lee, Eunjung Ko, and Dae-Hong Ko\*

Department of Materials Science and Engineering, Yonsei University, Seoul 03722, Korea.

\*E-mail : [dhko@yonsei.ac.kr](mailto:dhko@yonsei.ac.kr)

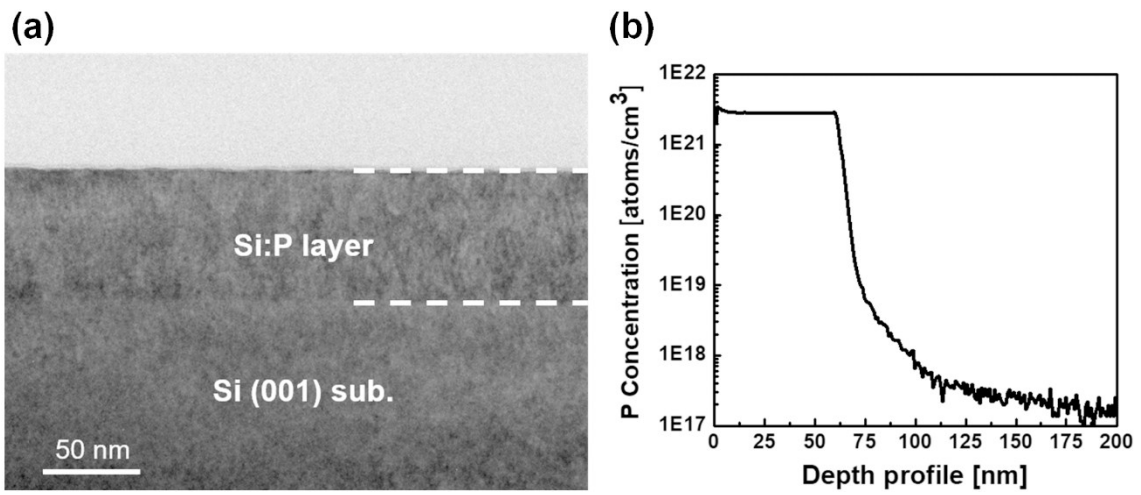

**Figure S1.** (a) A cross-sectional TEM image of the as-deposited epitaxial  $\text{Si}_{0.938}\text{P}_{0.062}$  layer grown on Si (001) substrates (b) P depth profile of the as-deposited epitaxial  $\text{Si}_{0.938}\text{P}_{0.062}$  layer grown on Si (001) substrates determined by SIMS measurements.

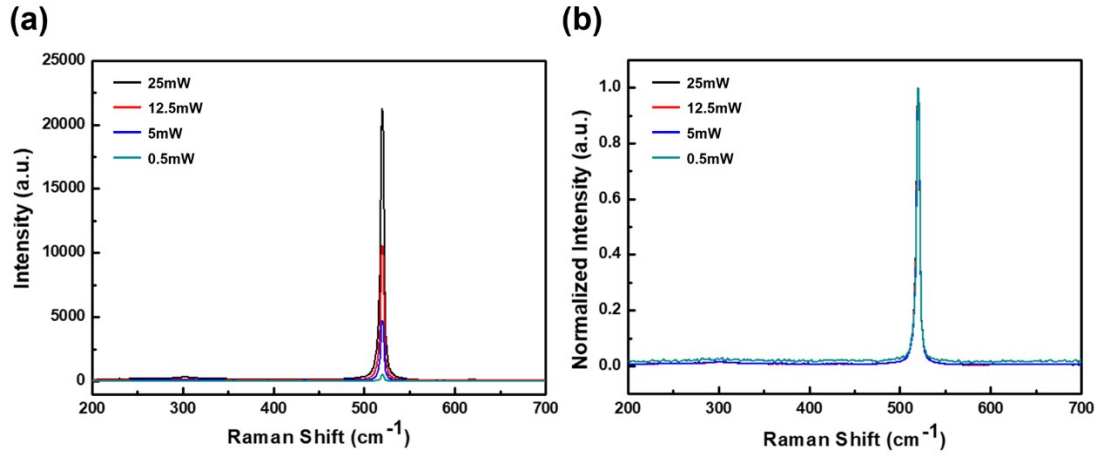

**Figure S2.** (a) Typical Visible Raman spectra of  $\text{Si}_{0.938}\text{P}_{0.062}$  sample as a function of the incident laser power. (b) Normalized Visible Raman spectra of  $\text{Si}_{0.938}\text{P}_{0.062}$  sample as a function of the incident laser power.

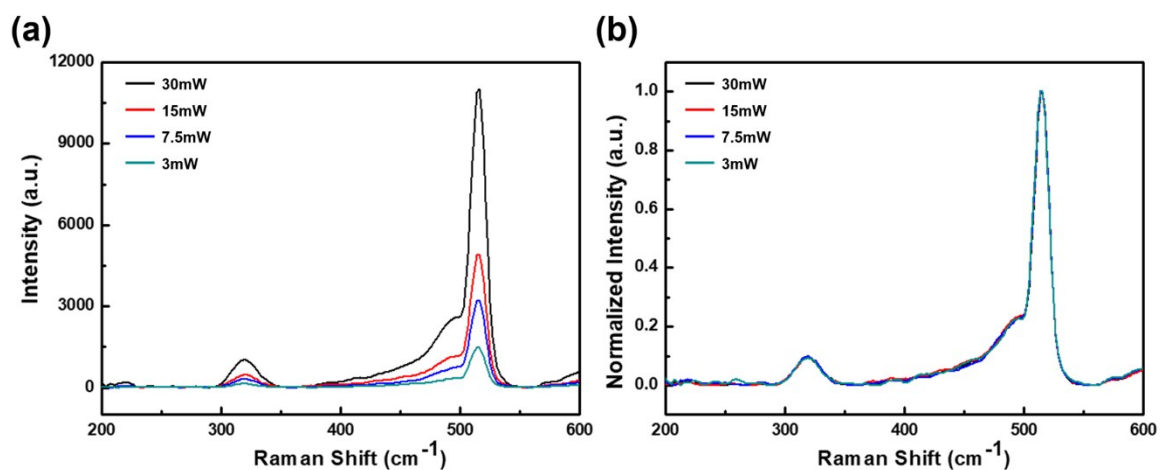

**Figure S3.** (a) Typical UV Raman spectra of  $\text{Si}_{0.938}\text{P}_{0.062}$  sample as a function of the incident laser power. (b) Normalized UV Raman spectra of  $\text{Si}_{0.938}\text{P}_{0.062}$  sample as a function of the incident laser power.

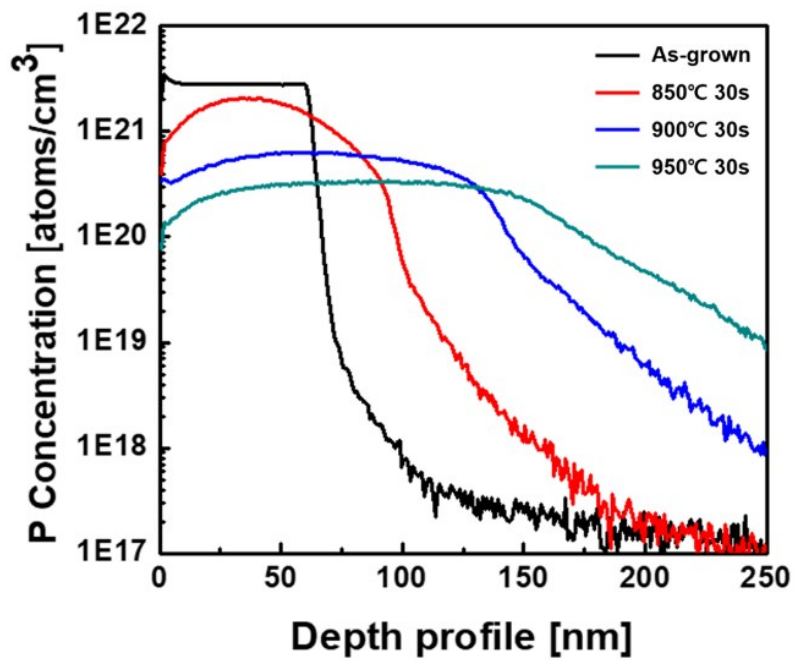

**Figure S4.** P depth profile of the as-grown and annealed  $\text{Si}_{0.938}\text{P}_{0.062}$  samples determined by SIMS measurements.
